# Supplementary material
Source: PubMed Central journal article supplement (PMC3017203)
Supplement: 1011728108_pnas.201011728SI.pdf [file 1011728108_pnas.201011728SI.pdf]

# Supporting Information

Essl et al. 10.1073/pnas.1011728108

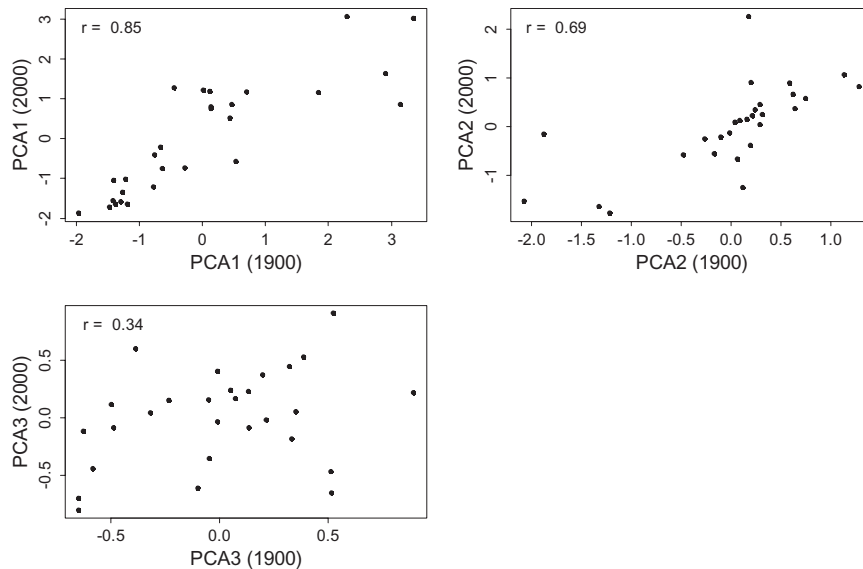

**Fig. S1.** Correlations between the three axes of two principal component analyses (PCA) of three socioeconomic indicators [gross domestic product (GDP), population density, and the share of exports in GDP], evaluated either for the year 1900 or the year 2000, across 28 European countries. The  $r$  values are Pearson's correlation coefficients between the axes scores of the individual countries in the PCAs of the 1900 and 2000 data, respectively.

**Table S1. Numbers of established alien plant, fungi and animal species in the 28 European countries covered by this study**

| Country                     | Vascular plants | Bryophytes | Fungi | Mammals | Birds | Reptiles | Amphibians | Fish | Terrestrial insects | Aquatic invertebrates |
|-----------------------------|-----------------|------------|-------|---------|-------|----------|------------|------|---------------------|-----------------------|
| Albania (AL)                |                 |            | 2     | 2       | 1     |          |            | 11   | 237                 | 4                     |
| Austria (AU)                | 276             | 2          | 37    | 8       | 8     | 0        | 0          | 17   | 265                 | 50                    |
| Belgium (BE)                | 447             | 3          | 30    | 8       | 16    | 0        | 3          | 12   | 185                 | 7                     |
| Bulgaria (BG)               |                 |            | 20    | 5       | 3     | 0        |            | 19   | 246                 |                       |
| Czech Republic (CZ)         | 229             | 2          | 30    | 8       | 6     | 0        |            | 10   | 329                 | 23                    |
| Denmark (DK)                |                 | 4          | 25    | 5       | 9     | 0        | 1          | 12   | 293                 | 13                    |
| Estonia (ES)                | 125             |            | 9     | 5       | 4     |          | 1          | 6    | 91                  | 11                    |
| Finland (FI)                |                 | 2          | 14    | 7       | 9     | 0        |            | 13   | 140                 | 6                     |
| France (FR)                 |                 | 3          | 61    | 10      | 20    | 2        | 5          | 12   | 575                 | 44                    |
| Germany (GE)                | 450             | 3          | 55    | 9       | 15    | 0        | 1          | 31   | 438                 | 53                    |
| Greece (GR)                 | 112             | 0          | 26    | 3       | 6     | 2        | 1          | 17   | 178                 | 0                     |
| Hungary (HU)                | 145             | 1          | 34    | 5       | 4     | 0        |            | 19   | 196                 | 17                    |
| Italy (IT)                  | 440             | 2          | 54    | 7       | 19    | 3        | 4          | 36   | 601                 | 57                    |
| Latvia (LA)                 |                 | 1          | 10    | 4       | 6     |          |            | 15   | 93                  | 6                     |
| Lithuania (LT)              | 256             | 1          | 22    | 7       | 6     | 0        |            | 7    | 108                 | 8                     |
| Netherlands (NL)            | 154             | 3          | 29    | 7       | 13    | 0        | 2          | 13   | 195                 | 9                     |
| Norway (NO)                 |                 | 1          | 21    | 7       | 8     |          |            | 13   | 122                 | 5                     |
| Poland (PL)                 | 259             | 1          | 34    | 6       | 6     | 0        |            | 12   | 183                 | 23                    |
| Portugal (Pg)               | 250             | 2          | 25    | 2       | 6     | 1        |            | 20   | 220                 | 20                    |
| Republic of Ireland (IR)    |                 | 6          | 24    | 6       | 7     | 1        | 2          | 15   | 87                  | 41                    |
| Romania (RO)                | 113             |            | 27    | 6       | 3     |          |            | 30   | 158                 | 14                    |
| Russia (European part) (RU) | 149             |            | 27    | 12      | 6     |          | 1          | 27   | 111                 | 27                    |
| Slovakia (SK)               | 182             | 0          | 23    | 7       | 5     | 0        |            | 28   | 126                 |                       |
| Spain (SP)                  |                 | 1          | 33    | 5       | 18    | 5        | 4          | 30   | 333                 | 30                    |
| Sweden (SW)                 |                 | 3          | 23    | 8       | 13    | 0        | 2          | 10   | 189                 | 14                    |
| Switzerland (SU)            | 170             | 1          | 47    | 5       | 7     | 1        | 0          | 16   | 302                 | 27                    |
| Ukraine (UR)                | 297             |            | 27    | 8       | 6     | 1        |            | 34   | 99                  | 96                    |
| United Kingdom (U.K.)       | 857             | 14         | 55    | 9       | 23    | 3        | 5          | 14   | 391                 | 50                    |

Species introduced before 1500 are not included. Empty cells indicate that the respective data are not available. Data sources (see [www.europe-aliens.org](http://www.europe-aliens.org) for species lists): vascular plants: (1); bryophytes (2); fungi: various (3); mammals: various (4); birds, reptiles, and amphibians: various (5); fish, aquatic invertebrates (6); terrestrial insects: various (7).

- Lambdon PW, et al. (2008) Alien flora of Europe: Species diversity, temporal trends geographical patterns and research needs. *Preslia* 80:101–149.
- Essl F, Lambdon PW (2009) The alien bryophytes and lichens of Europe. *Handbook of Alien Species in Europe*, ed DAISIE (Springer, Berlin), pp 29–41.
- Desprez-Loustau M-L (2009) The alien fungi of Europe. *Handbook of Alien Species in Europe*, ed DAISIE (Springer, Berlin), pp 15–28.
- Genovesi P, Bacher S, Kobelt M, Pascal M, Scalera R (2009) Alien mammals of Europe. *Handbook of Alien Species in Europe*, ed DAISIE (Springer, Berlin), pp 119–128.
- Kark S, Solarz W, Chiron F, Clergeau P, Shirley S (2009) Alien birds, amphibians and reptiles of Europe. *Handbook of Alien Species in Europe*, ed DAISIE (Springer, Berlin), pp 105–118.
- Gherardi F, Gollasch S, Minchin D, Olenin O, Panov V (2009) Alien invertebrates and fish in European inland waters. *Handbook of Alien Species in Europe*, ed DAISIE (Springer, Berlin), pp 81–92.
- Roques A, et al. (2009) Alien terrestrial invertebrates of Europe. *Handbook of Alien Species in Europe*, ed DAISIE (Springer, Berlin), pp 63–79.

**Table S2. Current and historical socioeconomic variables for the 28 European countries included in this study**

| Country                     | Area        | PD 2000 | GDP 2000 | EXP 2000 | PD 1900 | GDP 1900 | EXP 1900 |
|-----------------------------|-------------|---------|----------|----------|---------|----------|----------|
| Albania (AL)                | 28,769.2    | 125.2   | 2,651    | 1.9      | 28      | 685      | 0.8      |
| Austria (AU)                | 84,013.4    | 97.5    | 20,097   | 42.9     | 71      | 2,882    | 7.7      |
| Belgium (BE)                | 30,667.7    | 339.7   | 20,742   | 76.5     | 219     | 3,731    | 18.4     |
| Bulgaria (BG)               | 110,918.4   | 69.7    | 5,365    | 11.5     | 36      | 1,223    | 2.2      |
| Czech Republic (CZ)         | 78,875.7    | 129.6   | 9,047    | 24.1     | 110     | 2,400    | 7.7      |
| Denmark (DK)                | 45,268.8    | 120.0   | 23,010   | 41.9     | 57      | 3,017    | 11.4     |
| Estonia (ES)                | 45,344.3    | 29.3    | 10,894   | 18.6     | 17      | 1,767    | 2.5      |
| Finland (FI)                | 337,967.8   | 15.5    | 20,235   | 51.6     | 8       | 1,668    | 22.1     |
| France (FR)                 | 540,684.6   | 111.9   | 20,808   | 28.7     | 75      | 2,876    | 6.9      |
| Germany (GE)                | 358,024.9   | 231.0   | 18,596   | 38.9     | 152     | 2,985    | 14.1     |
| Greece (GR)                 | 132,134.0   | 84.2    | 12,044   | 7.6      | 38      | 1,351    | 1.0      |
| Hungary (HU)                | 93,032.3    | 108.5   | 7,138    | 26.9     | 77      | 1,682    | 7.7      |
| Italy (IT)                  | 251,645.2   | 230.9   | 18,740   | 26.1     | 134     | 1,785    | 4.7      |
| Latvia (LA)                 | 64,634.0    | 35.7    | 6,776    | 11.4     | 21      | 1,596    | 2.5      |
| Lithuania (LT)              | 64,885.7    | 52.9    | 7,162    | 15.6     | 27      | 1,546    | 2.5      |
| Netherlands (NL)            | 35,896.1    | 454.1   | 21,591   | 61.2     | 143     | 3,424    | 17.3     |
| Norway (NO)                 | 323,997.3   | 14.3    | 24,364   | 55.4     | 7       | 1,937    | 12.4     |
| Poland (PL)                 | 311,886.2   | 123.5   | 7,215    | 10.1     | 79      | 1,536    | 2.2      |
| Portugal (Pg)               | 88,861.8    | 118.1   | 14,022   | 17.4     | 61      | 1,302    | 6.8      |
| Republic of Ireland (IR)    | 70,452.5    | 58.9    | 22,015   | 53.9     | 63      | 2,510    | 6.1      |
| Romania (RO)                | 237,741.9   | 91.3    | 3,002    | 12.2     | 46      | 1,415    | 2.2      |
| Russia (European part) (RU) | 2,377,419.0 | 59.8    | 5,157    | 10.6     | 30      | 1,344    | 2.5      |
| Slovakia (SK)               | 48,989.9    | 110.2   | 7,837    | 24.4     | 67      | 1,600    | 5.1      |
| Spain (SP)                  | 493,597.9   | 91.3    | 15,269   | 23.5     | 38      | 1,786    | 6.8      |
| Sweden (SW)                 | 449,964.2   | 20.1    | 20,321   | 62.5     | 11      | 2,561    | 13.8     |
| Switzerland (SU)            | 41,232.5    | 175.9   | 22,025   | 51.8     | 80      | 3,833    | 29.9     |
| Ukraine (UR)                | 598,578.9   | 79.0    | 2,736    | 12.5     | 43      | 1,005    | 2.5      |
| United Kingdom (U.K.)       | 246,252.3   | 242.3   | 19,817   | 25.0     | 167     | 4,492    | 15.9     |

Area, country area (km<sup>2</sup>); PD 2000, PD 1900, human population density (people/km<sup>2</sup>); GDP 2000, GDP 1900, standardized per capita GDP (standardized 1990 International Geary-Khamis Dollar); EXP 2000, EXP 1900, share of exports in GDP for the years 2000 or 1900, respectively.

**Table S3. Loadings of socioeconomic indicator variables for the years 1900 and 2000, respectively, in a PCA across 28 European countries**

| Year               | PCA 1 | PCA 2 | PCA 3 |
|--------------------|-------|-------|-------|
| 1900               |       |       |       |
| GDP                | 0.64  | -0.05 | -0.77 |
| Population density | 0.53  | 0.75  | 0.39  |
| Exports            | 0.56  | -0.66 | 0.5   |
| 2000               |       |       |       |
| GDP                | 0.64  | -0.33 | -0.69 |
| Population density | 0.42  | 0.91  | 0.048 |
| Exports            | 0.65  | -0.26 | 0.72  |

**Table S4. Akaike Information Criterion (AIC) and Pearson's correlation coefficient  $r$  between model predictions and response variables for spatial autoregressive error models relating alien-species richness of 10 different taxonomic groups to current (year 2000) or historical (year 1900) socioeconomic indicators across 28 European countries**

| Taxon                 | AIC <sub>1900</sub> | AIC <sub>2000</sub> | $r_{1900}$ | $r_{2000}$ |
|-----------------------|---------------------|---------------------|------------|------------|
| Vascular plants       | 31.10               | 45.06               | 0.90       | 0.65       |
| Bryophytes            | 59.82               | 74.51               | 0.86       | 0.69       |
| Fungi                 | 25.10               | 30.87               | 0.78       | 0.73       |
| Birds                 | 34.98               | 29.80               | 0.82       | 0.86       |
| Mammals               | 10.29               | 13.97               | 0.71       | 0.66       |
| Reptiles              | 88.38               | 81.39               | 0.47       | 0.62       |
| Amphibians            | 46.50               | 49.82               | 0.66       | 0.57       |
| Fish                  | 35.57               | 40.04               | 0.52       | 0.38       |
| Terrestrial insects   | 50.53               | 39.65               | 0.59       | 0.75       |
| Aquatic invertebrates | 69.45               | 72.17               | 0.42       | 0.29       |

**Table S5. Spatial autocorrelation in the residuals of autoregressive error models relating alien-species richness of 10 different taxonomic groups to current (year 2000) or historical (year 1900) socioeconomic indicators, respectively, across 28 European countries**

| Taxon                 | 1900   | 2000   |
|-----------------------|--------|--------|
| Vascular plants       | -0.035 | -0.053 |
| Bryophytes            | 0.032  | -0.069 |
| Fungi                 | 0.050  | 0.043  |
| Birds                 | 0.001  | 0.022  |
| Mammals               | 0.005  | -0.016 |
| Reptiles              | 0.005  | 0.004  |
| Amphibians            | 0.037  | 0.006  |
| Fish                  | -0.008 | 0.006  |
| Terrestrial insects   | 0.011  | -0.016 |
| Aquatic invertebrates | 0.004  | 0.004  |

Spatial positions of the countries were defined by the geographical coordinates of their capitals. Moran's  $I$  was used as a measure of spatial autocorrelation and its values were calculated for a neighborhood radius of 1,000 km. Significance was evaluated by means of 999 permutations of the vector of model residuals using the function *moran.mc* implemented in the R-package *spdep* (1).  $P$  values for all tested  $I$  were  $> 0.05$ .

1. Bivand L, et al. (2009) *spdep: Spatial dependence: Weighting schemes, statistics and models*, R package version 0.4–24.

**Table S6. Akaike weights for the effects of three socioeconomic variables**

| Taxon                 | 1900 |      |      | 2000 |      |      |
|-----------------------|------|------|------|------|------|------|
|                       | PD   | GDP  | EXP  | PD   | GDP  | EXP  |
| All taxa              | 0.43 | 0.43 | 0.14 | 0.37 | 0.37 | 0.26 |
| Vascular plants       | 0.60 | 0.26 | 0.14 | 0.25 | 0.52 | 0.23 |
| Bryophytes            | 0.30 | 0.54 | 0.16 | 0.41 | 0.42 | 0.17 |
| Fungi                 | 0.47 | 0.38 | 0.15 | 0.32 | 0.43 | 0.25 |
| Birds                 | 0.43 | 0.47 | 0.10 | 0.42 | 0.42 | 0.15 |
| Mammals               | 0.31 | 0.52 | 0.17 | 0.28 | 0.18 | 0.54 |
| Reptiles              | 0.29 | 0.37 | 0.35 | 0.11 | 0.47 | 0.42 |
| Amphibians            | 0.56 | 0.19 | 0.25 | 0.48 | 0.31 | 0.21 |
| Fish                  | 0.45 | 0.4  | 0.15 | 0.46 | 0.3  | 0.25 |
| Terrestrial insects   | 0.48 | 0.33 | 0.19 | 0.23 | 0.38 | 0.38 |
| Aquatic invertebrates | 0.43 | 0.35 | 0.22 | 0.33 | 0.38 | 0.28 |

Akaike weights for the effects of three socioeconomic variables, evaluated at two different time points (years 1900 and 2000, respectively), on the number of established alien species in 10 taxonomic groups across 28 European countries. The three variables are human population density (PD), standardized per capita GDP, and the share of exports in GDP (EXP). Akaike weights are based on spatial autoregressive error models for the single taxonomic groups and on linear mixed effects models with an exponential spatial within-group correlation structure for the combined analysis of all groups. Separately for each time point, we fitted models with all seven possible combinations of the three predictor variables and calculated the AIC and, subsequently, the Akaike weights for each of these fitted models. The Akaike weight of each predictor was then computed as the sum of the Akaike weights of all of the models which contained the respective variable (1)

1. Burnham KP, Anderson DR (2004) Multimodel inference: understanding AIC and BIC in model selection. *Sociol Method Res* 33:261–304.
